# Supplementary material
Source: publisher site journal article supplement (https://study.sagepub.com/system/files/appendix_b.pdf)
Supplement: Supplementary file 1 [file appendix_b.pdf]

# APPENDIX B: QUESTIONNAIRE FOR CLASS SURVEY

Questionnaire for Class Survey

ID \_\_\_\_\_ (CODE LEADING ZEROS)

CHLDIDEL 1. What do you think is the ideal number of children for a family to have? \_\_\_\_\_

\_\_\_\_\_ (CODE LEADING ZERO IF < 10) 1 2 3

2. If you had to choose, which thing on this list would you say is the most important for a child to learn to prepare him or her for life? \_\_\_\_\_

(CODE 1) 4 5

[INTERVIEWER: READ CHOICES BELOW]

OBEY \_\_\_\_\_ A. to obey 6

POPULAR \_\_\_\_\_ B. to be well liked or popular 7

THNKSELF \_\_\_\_\_ C. to think for himself or herself 8

WORKHARD \_\_\_\_\_ D. to work hard 9

HELPOTH \_\_\_\_\_ E. to help others 10

a. Which comes next in importance? (Code 2) 10

b. Which comes third? (Code 3)

c. Which comes fourth? (Code 4)

d. Which comes fifth? (Code 5) (no response: Code 9)

SIBS 3. How many brothers and sisters did you have? Please count those born \_\_\_\_\_

alive, but no longer living, as well as those alive now. Also include 11 12

stepbrothers and stepsisters and children adopted by your parents.

\_\_\_\_\_ (CODE NUMBER WITH LEADING ZERO)

MARITAL 4. Are you married, widowed, divorced, or separated, or have you never been married?

\_\_\_\_\_ 1. married 13

\_\_\_\_\_ 2. widowed

\_\_\_\_\_ 3. divorced

\_\_\_\_\_ 4. separated

\_\_\_\_\_ 5. never married

\_\_\_\_\_ 9. no answer

[INTERVIEWER: ASK QUESTION 5 ONLY IF MARRIED OR WIDOWED]

DIVORCE 5. Have you ever been divorced or legally separated? \_\_\_\_\_

14

\_\_\_\_\_ 1. yes

\_\_\_\_\_ 2. no

\_\_\_\_\_ 3. no answer or not applicable

PARTYID 6. Generally speaking, do you usually think of yourself as a Republican, \_\_\_\_\_

Democrat, independent, or something else? 15

\_\_\_\_\_ 0. strong Democrat

\_\_\_\_\_ 1. not very strong Democrat

\_\_\_\_\_ 2. independent, close to Democrat

\_\_\_\_\_ 3. independent, neither, or no response

\_\_\_\_\_ 4. independent, close to Republican

|          |                                                                                                                                                                                                                                                                                               |         |
|----------|-----------------------------------------------------------------------------------------------------------------------------------------------------------------------------------------------------------------------------------------------------------------------------------------------|---------|
|          | _____ 5. not very strong Republican                                                                                                                                                                                                                                                           |         |
|          | _____ 6. strong Republican                                                                                                                                                                                                                                                                    |         |
|          | _____ 7. other party, refused to say                                                                                                                                                                                                                                                          |         |
|          | _____ 9. no answer                                                                                                                                                                                                                                                                            |         |
| POLVIEWS | 7. We hear a lot of talk these days about liberals and conservatives. I'm going to read you a set of seven categories of political views that people might hold, arranged from extremely liberal to extremely conservative. Which best describes you, or haven't you thought much about this? | —<br>16 |
|          | _____ 1. extremely liberal                                                                                                                                                                                                                                                                    |         |
|          | _____ 2. liberal                                                                                                                                                                                                                                                                              |         |
|          | _____ 3. slightly liberal                                                                                                                                                                                                                                                                     |         |
|          | _____ 4. moderate, middle-of-the-road                                                                                                                                                                                                                                                         |         |
|          | _____ 5. slightly conservative                                                                                                                                                                                                                                                                |         |
|          | _____ 6. conservative                                                                                                                                                                                                                                                                         |         |
|          | _____ 7. extremely conservative                                                                                                                                                                                                                                                               |         |
|          | _____ 9. no answer or not applicable                                                                                                                                                                                                                                                          |         |
| CAPPUN   | 8. Do you favor or oppose the death penalty for murder?                                                                                                                                                                                                                                       | —<br>17 |
|          | _____ 1. favor                                                                                                                                                                                                                                                                                |         |
|          | _____ 2. oppose                                                                                                                                                                                                                                                                               |         |
|          | _____ 9. don't know, no answer                                                                                                                                                                                                                                                                |         |
| GUNLAW   | 9. Would you favor or oppose a law that would require a person to obtain a police permit before he or she could buy a gun?                                                                                                                                                                    | —<br>18 |
|          | _____ 1. favor                                                                                                                                                                                                                                                                                |         |
|          | _____ 2. oppose                                                                                                                                                                                                                                                                               |         |
|          | _____ 9. don't know, no answer                                                                                                                                                                                                                                                                |         |
| GETAHEAD | 10. Some people say that people get ahead by their own hard work; others say that lucky breaks or help from other people is more important. Which do you think is most important?                                                                                                             | —<br>19 |
|          | _____ 1. hard work most important                                                                                                                                                                                                                                                             |         |
|          | _____ 2. hard work, luck equally important                                                                                                                                                                                                                                                    |         |
|          | _____ 3. luck most important                                                                                                                                                                                                                                                                  |         |
|          | _____ 9. other, don't know, no answer                                                                                                                                                                                                                                                         |         |
| RACDIF4  | 11. On the average, African Americans have worse jobs, incomes, and housing than White people. Do you think this is because African Americans just don't have the motivation or will to pull themselves up out of poverty?                                                                    | —<br>20 |
|          | _____ 1. yes                                                                                                                                                                                                                                                                                  |         |
|          | _____ 2. no                                                                                                                                                                                                                                                                                   |         |
| RACMAR   | 12. Do you think there should be laws against marriages between (Negroes/Blacks/African Americans) and Whites?                                                                                                                                                                                | —<br>21 |
|          | _____ 1. yes                                                                                                                                                                                                                                                                                  |         |
|          | _____ 2. no                                                                                                                                                                                                                                                                                   |         |
|          | _____ 8. don't know                                                                                                                                                                                                                                                                           |         |
|          | _____ 9. no answer, not applicable                                                                                                                                                                                                                                                            |         |
| RACPUSH  | 13. Some people have expressed the opinion that (Negroes/Blacks/African Americans) shouldn't push themselves in to where they're not wanted. Which of these responses comes closest to how you, yourself, feel?                                                                               | —<br>22 |
|          | _____ 1. agree strongly                                                                                                                                                                                                                                                                       |         |
|          | _____ 2. agree slightly                                                                                                                                                                                                                                                                       |         |

|          |                                                                                                                            |    |
|----------|----------------------------------------------------------------------------------------------------------------------------|----|
|          | _____ 3. disagree slightly                                                                                                 |    |
|          | _____ 4. disagree strongly                                                                                                 |    |
|          | _____ 8. no opinion                                                                                                        |    |
|          | _____ 9. no answer, not applicable                                                                                         |    |
| ABDEFECT | 14. Please tell me whether or not you think it should be possible for a pregnant woman to obtain a legal abortion if . . . |    |
|          | A. If there is a strong chance of serious defect in the baby?                                                              | 23 |
|          | _____ 1. yes                                                                                                               |    |
|          | _____ 2. no                                                                                                                |    |
|          | _____ 3. don't know, no answer                                                                                             |    |
| ABNOMORE | B. If she is married and does not want any more children?                                                                  | 24 |
|          | _____ 1. yes                                                                                                               |    |
|          | _____ 2. no                                                                                                                |    |
|          | _____ 3. don't know, no answer                                                                                             |    |
| ABHLTH   | C. If the woman's own health is seriously endangered by the pregnancy?                                                     | 25 |
|          | _____ 1. yes                                                                                                               |    |
|          | _____ 2. no                                                                                                                |    |
|          | _____ 3. don't know, no answer                                                                                             |    |
| ABPOOR   | D. If the family has a very low income and cannot afford any more children?                                                | 26 |
|          | _____ 1. yes                                                                                                               |    |
|          | _____ 2. no                                                                                                                |    |
|          | _____ 3. don't know, no answer                                                                                             |    |
| ABRAPE   | E. If she became pregnant as a result of rape?                                                                             | 27 |
|          | _____ 1. yes                                                                                                               |    |
|          | _____ 2. no                                                                                                                |    |
|          | _____ 3. don't know, no answer                                                                                             |    |
| ABSINGLE | F. If she is not married and does not want to marry the man?                                                               | 28 |
|          | _____ 1. yes                                                                                                               |    |
|          | _____ 2. no                                                                                                                |    |
|          | _____ 3. don't know, no answer                                                                                             |    |
| ABANY    | G. If the woman wants it for any reason?                                                                                   | 29 |
|          | _____ 1. yes                                                                                                               |    |
|          | _____ 2. no                                                                                                                |    |
|          | _____ 3. don't know, no answer                                                                                             |    |
| RELIG    | 15. What is your religious preference? Is it Protestant, Catholic, Jewish, some other religion, or no religion?            | 30 |
|          | _____ 1. Protestant                                                                                                        |    |
|          | _____ 2. Catholic                                                                                                          |    |
|          | _____ 3. Jewish                                                                                                            |    |
|          | _____ 4. none                                                                                                              |    |
|          | _____ 5. other                                                                                                             |    |
|          | _____ 9. no answer, no response                                                                                            |    |
| ATTEND   | 16. How often do you attend religious services?                                                                            | 31 |
|          | _____ 0. never                                                                                                             |    |
|          | _____ 1. less than once a year                                                                                             |    |

|          |                                                                                                                                                                                                                                                                              |    |
|----------|------------------------------------------------------------------------------------------------------------------------------------------------------------------------------------------------------------------------------------------------------------------------------|----|
|          | _____ 2. about once or twice a year                                                                                                                                                                                                                                          |    |
|          | _____ 3. several times a year                                                                                                                                                                                                                                                |    |
|          | _____ 4. about once a month                                                                                                                                                                                                                                                  |    |
|          | _____ 5. 2 or 3 times a month                                                                                                                                                                                                                                                |    |
|          | _____ 6. nearly every week                                                                                                                                                                                                                                                   |    |
|          | _____ 7. every week                                                                                                                                                                                                                                                          |    |
|          | _____ 8. several times a week                                                                                                                                                                                                                                                |    |
|          | _____ 9. don't know, no answer                                                                                                                                                                                                                                               |    |
| POSTLIFE | 17. Do you believe there is a life after death?                                                                                                                                                                                                                              | 32 |
|          | _____ 1. yes                                                                                                                                                                                                                                                                 |    |
|          | _____ 2. no                                                                                                                                                                                                                                                                  |    |
|          | _____ 9. undecided, no answer, not applicable                                                                                                                                                                                                                                |    |
| PRAY     | 18. About how often do you pray?                                                                                                                                                                                                                                             | 33 |
|          | _____ 1. several times a day                                                                                                                                                                                                                                                 |    |
|          | _____ 2. once a day                                                                                                                                                                                                                                                          |    |
|          | _____ 3. several times a week                                                                                                                                                                                                                                                |    |
|          | _____ 4. once a week                                                                                                                                                                                                                                                         |    |
|          | _____ 5. less than once a week                                                                                                                                                                                                                                               |    |
|          | _____ 6. never                                                                                                                                                                                                                                                               |    |
|          | _____ 9. don't know, no answer, not applicable                                                                                                                                                                                                                               |    |
| PREMARSX | 19. There has been a lot of discussion about the way morals and attitudes about sex are changing in this country. If a man and woman have sexual relations before marriage, do you think it is always wrong, almost always wrong, wrong only sometimes, or not wrong at all? | 34 |
|          | _____ 1. always wrong                                                                                                                                                                                                                                                        |    |
|          | _____ 2. almost always wrong                                                                                                                                                                                                                                                 |    |
|          | _____ 3. wrong only sometimes                                                                                                                                                                                                                                                |    |
|          | _____ 4. not wrong at all                                                                                                                                                                                                                                                    |    |
|          | _____ 9. don't know, no answer                                                                                                                                                                                                                                               |    |
| HOMOSEX  | 20. What about sexual relations between two adults of the same sex? Do you think it is always wrong, almost always wrong, wrong only sometimes, or not wrong at all?                                                                                                         | 35 |
|          | _____ 1. always wrong                                                                                                                                                                                                                                                        |    |
|          | _____ 2. almost always wrong                                                                                                                                                                                                                                                 |    |
|          | _____ 3. wrong only sometimes                                                                                                                                                                                                                                                |    |
|          | _____ 4. ot wrong at all                                                                                                                                                                                                                                                     |    |
|          | _____ 9 don't know, no answer                                                                                                                                                                                                                                                |    |
| XMOVIE   | 21. Have you seen an X-rated movie in the last year?                                                                                                                                                                                                                         | 36 |
|          | _____ 1. yes                                                                                                                                                                                                                                                                 |    |
|          | _____ 2. no                                                                                                                                                                                                                                                                  |    |
|          | _____ 3. don't know, no answer                                                                                                                                                                                                                                               |    |

EDUC 22. What is the highest grade in elementary school or high school that you finished and got credit for? \_\_\_ \_\_\_  
37 38

[INTERVIEWER: IF RESPONDENT COMPLETED 12 GRADES, ASK QUESTION 23.]

23. Did you complete one or more years of college for credit, not including schooling such as business college or technical or vocational school?

- \_\_\_\_\_ 1. yes
- \_\_\_\_\_ 2. no

[INTERVIEWER: IF YES TO QUESTION 23, GO TO QUESTION 24; ELSE GO TO QUESTION 25.]

24. How many years did you complete?

CODING INSTRUCTION: ADD YEARS FROM QUESTION 22 TO YEARS FROM QUESTION 24 AND CODE WITH LEADING ZERO IF NECESSARY IN COLUMNS 37 AND 38. USE CODE 99 FOR NO RESPONSE.

SEI 25. What is your occupation? \_\_\_ \_\_\_  
39 40  
\_\_\_\_\_ (write in)

[INTERVIEWER: IF RESPONDENT HAS NOT BEEN EMPLOYED FULL-TIME, RECORD HIS OR HER FATHER'S OCCUPATION.]

CODING INSTRUCTION: LOOK UP OCCUPATION ON HODGE, SIEGEL, AND ROSSI PRESTIGE SCALE AND RECORD SCORE IN COLUMNS 39 AND 40. USE CODE 99 FOR NO RESPONSE.

CLASS 26. If you were asked to describe your social class with one of the following four terms, which would you say you belong in the lower class, the working class, the middle class, or the upper class? \_\_\_ \_\_\_  
41

- \_\_\_\_\_ 1. lower class
- \_\_\_\_\_ 2. working class
- \_\_\_\_\_ 3. middle class
- \_\_\_\_\_ 4. upper class
- \_\_\_\_\_ 9. don't know, no answer

AGE 27. In what year were you born? \_\_\_ \_\_\_  
42 43

CODING INSTRUCTION: SUBTRACT BIRTH YEAR FROM THIS YEAR TO GET AGE IN YEARS. CODE IN COLUMNS 42 AND 43. CODE 99 FOR NO RESPONSE.

INCOME98 28. In which of these groups did your total family income, from all sources, fall last year, before taxes? Just tell me to stop when I say the category that describes your family. \_\_\_ \_\_\_  
44 45

- \_\_\_\_\_ 1. under \$1,000
- \_\_\_\_\_ 2 \$1,000 to \$2,999
- \_\_\_\_\_ 3 \$3,000 to \$3,999
- \_\_\_\_\_ 4 \$4,000 to \$4,999
- \_\_\_\_\_ 5 \$5,000 to \$5,999
- \_\_\_\_\_ 6 \$6,000 to \$6,999
- \_\_\_\_\_ 7 \$7,000 to \$7,999
- \_\_\_\_\_ 8 \$8,000 to \$9,999
- \_\_\_\_\_ 9 \$10,000 to \$12,499
- \_\_\_\_\_ 10 \$12,500 to \$14,999

- \_\_\_\_\_ 11 \$15,000 to \$17,499
- \_\_\_\_\_ 12 \$17,500 to \$19,999
- \_\_\_\_\_ 13 \$20,000 to \$22,499
- \_\_\_\_\_ 14 \$22,500 to \$24,999
- \_\_\_\_\_ 15 \$25,000 to \$29,999
- \_\_\_\_\_ 16 \$30,000 to \$34,999
- \_\_\_\_\_ 17 \$35,000 to \$39,999
- \_\_\_\_\_ 18 \$40,000 to \$49,999
- \_\_\_\_\_ 19 \$50,000 to \$59,999
- \_\_\_\_\_ 20 \$60,000 to \$74,999
- \_\_\_\_\_ 21 \$75,000 to \$89,999
- \_\_\_\_\_ 22 \$90,000 to \$109,999
- \_\_\_\_\_ 23 \$110,000 or over
- \_\_\_\_\_ 99 refused, don't know, not applicable

RACE 30. CODING INSTRUCTION: CODE WITHOUT ASKING ONLY IF THERE IS NO DOUBT IN YOUR MIND. \_\_\_\_\_ 46

- \_\_\_\_\_ 1. White
- \_\_\_\_\_ 2. Black
- \_\_\_\_\_ 3. other

SEX 31. CODING INSTRUCTION: CODE RESPONDENT'S SEX. \_\_\_\_\_ 47

- \_\_\_\_\_ 1. male
- \_\_\_\_\_ 2. female

## OCCUPATIONAL TITLE AND SOCIOECONOMIC PRESTIGE SCORES

Below are occupational titles and socioeconomic index scores for use in coding the question 25, SEI, on the above questionnaire. To find a respondent's SEI score, look through the occupational titles until you find one that matches or is similar to the respondent's occupation. Write the number that appears to the right of the occupation in the space provided for it in the right margin of question 25 on the questionnaire.

The occupational prestige scores were developed by Robert W. Hodge, Paul S. Siegel, and Peter H. Rossi at the University of Chicago (and updated in 1989 by Robert W. Hodge, Judith Treas, and Keiko Nakao). You can learn more about how the prestige scores were obtained by reading Appendices F and G in *General Social Survey, 1972–2010: Cumulative Codebook* (Smith, Marsden, & Hout, 2011).<sup>1</sup>

| Occupational Title                                  | SEI Score |
|-----------------------------------------------------|-----------|
| <i>PROFESSIONAL, TECHNICAL, AND KINDRED WORKERS</i> |           |
| Accountants                                         | 57        |
| Architects                                          | 71        |
| Computer specialists                                |           |
| Computer programmers                                | 51        |
| Computer systems analysts                           | 51        |
| Computer specialists, n.e.c.                        | 51        |
| <i>Engineers</i>                                    |           |
| Aerospace engineers                                 | 71        |
| Chemical engineers                                  | 67        |
| Civil engineers                                     | 68        |
| Electrical and electronic engineers                 | 69        |
| Industrial engineers                                | 54        |
| Mechanical engineers                                | 62        |
| Metallurgical and materials engineers               | 56        |
| Mining engineers                                    | 62        |
| Petroleum engineers                                 | 67        |
| Sales engineers                                     | 51        |
| Engineers, n.e.c.                                   | 67        |
| Farm management advisers                            | 54        |
| Foresters and conservationists                      | 54        |
| Home management advisers                            | 54        |
| Lawyers and judges                                  |           |
| Judges                                              | 76        |
| Lawyers                                             | 76        |
| <i>Librarians, archivists, and curators</i>         |           |
| Librarians                                          | 55        |

| Occupational Title                                     | SEI Score |
|--------------------------------------------------------|-----------|
| Archivists and curators                                | 66        |
| Mathematical specialists                               |           |
| Actuaries                                              | 55        |
| Mathematicians                                         | 65        |
| Statisticians                                          | 55        |
| <i>Life and physical scientists</i>                    |           |
| Agricultural scientists                                | 56        |
| Atmospheric and space scientists                       | 68        |
| Biological scientists                                  | 68        |
| Chemists                                               | 69        |
| Geologists                                             | 67        |
| Marine scientists                                      | 68        |
| Physicists and astronomers                             | 74        |
| Life and physical scientists, n.e.c.                   | 68        |
| Operations and systems researchers and analysts        | 51        |
| Personnel and labor relation workers                   | 56        |
| <i>Physicians, dentists, and related practitioners</i> |           |
| Chiropractors                                          | 60        |
| Dentists                                               | 74        |
| Optometrists                                           | 62        |
| Pharmacists                                            | 61        |
| Physicians, including osteopaths                       | 82        |
| Podiatrists                                            | 37        |
| Veterinarians                                          | 60        |
| Health practitioners, n.e.c.                           | 51        |
| <i>Nurses, dietitians, and therapists</i>              |           |

1. Smith, T. W., Marsden, P. V., & Hout, M. (2011). *General Social Surveys, 1972–2010: Cumulative codebook*. Storrs, CT: Roper Center for Public Opinion Research, University of Connecticut; Ann Arbor, MI: Inter-university Consortium for Political and Social Research.

| Occupational Title                                     | SEI Score |
|--------------------------------------------------------|-----------|
| Dietitians                                             | 52        |
| Registered nurses                                      | 62        |
| Therapists                                             | 37        |
| <i>Health technologists and technicians</i>            |           |
| Clinical laboratory technologists and technicians      | 61        |
| Dental hygienists                                      | 61        |
| Health record technologists and technicians            | 61        |
| Radiologic technologists and technicians               | 61        |
| Therapy assistants                                     | 37        |
| Health technologists and technicians, n.e.c.           | 47        |
| <i>Religious workers</i>                               |           |
| Clergy                                                 | 69        |
| Religious workers, n.e.c.                              | 56        |
| Social scientists                                      |           |
| Economists                                             | 57        |
| Political scientists                                   | 66        |
| Psychologists                                          | 71        |
| Sociologists                                           | 66        |
| Urban and regional planners                            | 66        |
| Social scientists, n.e.c.                              | 66        |
| <i>Social and recreation workers</i>                   |           |
| Social workers                                         | 52        |
| Recreation workers                                     | 49        |
| <i>Teachers, college and university</i>                |           |
| College agriculture teachers                           | 78        |
| College atmospheric, earth, marine, and space teachers | 78        |
| College biology teachers                               | 78        |
| College chemistry teachers                             | 78        |
| College physics teachers                               | 78        |
| College engineering teachers                           | 78        |
| College mathematics teachers                           | 78        |
| College health specialists teachers                    | 78        |
| College psychology teachers                            | 78        |
| College business and commerce teachers                 | 78        |
| College economics teachers                             | 78        |
| College history teachers                               | 78        |
| College sociology teachers                             | 78        |
| College social science teachers, n.e.c.                | 78        |
| College art, drama, and music teachers                 | 78        |

| Occupational Title                                          | SEI Score |
|-------------------------------------------------------------|-----------|
| College coaches and physical education teachers             | 78        |
| College education teachers                                  | 78        |
| College English teachers                                    | 78        |
| College foreign language teachers                           | 78        |
| College home economics teachers                             | 78        |
| College law teachers                                        | 78        |
| College theology teachers                                   | 78        |
| College trade, industrial, and technical teachers           | 78        |
| Miscellaneous teachers, college and university              | 78        |
| Teachers, college and university, subject not specified     | 78        |
| <i>Teachers, except college and university</i>              |           |
| Adult education teachers                                    | 43        |
| Elementary school teachers                                  | 60        |
| Pre-kindergarten and kindergarten teachers                  | 60        |
| Secondary school teachers                                   | 63        |
| Teachers, except college and university, n.e.c.             | 43        |
| <i>Engineering and science technicians</i>                  |           |
| Agriculture and biological technicians, except health       | 47        |
| Chemical technicians                                        | 47        |
| Draftsmen                                                   | 56        |
| Electrical and electronic engineering technicians           | 47        |
| Industrial engineering technicians                          | 47        |
| Mechanical engineering technicians                          | 47        |
| Mathematical technicians                                    | 47        |
| Surveyors                                                   | 53        |
| Engineering and science technicians, n.e.c.                 | 47        |
| <i>Technicians, except health, engineering, and science</i> |           |
| Airplane pilots                                             | 70        |
| Air traffic controllers                                     | 43        |
| Embalmers                                                   | 52        |
| Flight engineers                                            | 47        |
| Radio operators                                             | 43        |
| Tool programmers, numerical control                         | 47        |



| Occupational Title                                                  | SEI Score |
|---------------------------------------------------------------------|-----------|
| Technicians, n.e.c.                                                 | 47        |
| Vocational and educational counselors                               | 51        |
| <i>Writers, artists, and entertainers</i>                           |           |
| Actors                                                              | 55        |
| Athletes and kindred workers                                        | 51        |
| Authors                                                             | 60        |
| Dancers                                                             | 38        |
| Designers                                                           | 58        |
| Editors and reporters                                               | 51        |
| Musicians and composers                                             | 46        |
| Painters and sculptors                                              | 56        |
| Photographers                                                       | 41        |
| Public relations men and publicity writers                          | 57        |
| Radio and television announcers                                     | 51        |
| Writers, artists, and entertainers, n.e.c.                          | 51        |
| Research workers, not specified                                     | 51        |
| Professional, technical, and kindred workers—allocated              | 51        |
| <i>MANAGERS AND ADMINISTRATORS, EXCEPT FARM</i>                     |           |
| Assessors, controllers, and treasurers, local public administration | 61        |
| Bank officers and financial managers                                | 72        |
| Buyers and shippers, farm products                                  | 41        |
| Buyers, wholesale and retail trade                                  | 50        |
| Credit men                                                          | 49        |
| Funeral directors                                                   | 52        |
| Health administrators                                               | 61        |
| Construction inspectors, public administration                      | 41        |
| Inspectors, except construction, public administration              | 41        |
| Managers and superintendents, building                              | 38        |
| Office managers, n.e.c.                                             | 50        |
| Officers, pilots, and pursers; ship                                 | 60        |
| Officials and administrators; public administration, n.e.c.         | 61        |

| Occupational Title                                 | SEI Score |
|----------------------------------------------------|-----------|
| Officials of lodges, societies, and unions         | 58        |
| Postmasters and mail superintendents               | 58        |
| Purchasing agents and buyers, n.e.c.               | 48        |
| Railroad conductors                                | 41        |
| Restaurant, cafeteria, and bar managers            | 39        |
| Sales managers and department heads, retail        | 50        |
| Sales managers, except retail trade                | 50        |
| School administrators, college                     | 61        |
| School administrators, elementary and secondary    | 60        |
| Managers and administrators, n.e.c.                | 50        |
| Managers and administrators, except farm—allocated | 50        |
| <i>SALES WORKERS</i>                               |           |
| Advertising agents and sales representatives       | 42        |
| Auctioneers                                        | 32        |
| Demonstrators                                      | 28        |
| Hucksters and peddlers                             | 18        |
| Insurance agents, brokers, and underwriters        | 47        |
| Newsboys                                           | 15        |
| Real estate agents and brokers                     | 44        |
| Stocks and bonds sales representatives             | 51        |
| Sales representatives and sales clerks, n.e.c.     | 34        |
| Sales representatives, manufacturing industries    | 49        |
| Sales representatives, wholesale trade             | 40        |
| Sales clerks, retail trade                         | 29        |
| Sales representatives, retail trade                | 29        |
| Sales representatives of services and construction | 34        |
| Sales workers—allocated                            | 34        |
| <i>CLERICAL AND KINDRED WORKERS</i>                |           |
| Bank tellers                                       | 50        |
| Billings clerks                                    | 45        |
| Bookkeepers                                        | 48        |
| Cashiers                                           | 31        |

| Occupational Title                                | SEI Score |
|---------------------------------------------------|-----------|
| Clerical assistants, social welfare               | 36        |
| Clerical supervisors, n.e.c.                      | 36        |
| Collectors, bill and account                      | 26        |
| Counter clerks, except food                       | 36        |
| Dispatchers and starters, vehicle                 | 34        |
| Enumerators and interviewers                      | 36        |
| Estimators and investigators, n.e.c.              | 36        |
| Expeditors and production controllers             | 36        |
| File clerks                                       | 30        |
| Insurance adjusters, examiners, and investigators | 48        |
| Library attendants and assistants                 | 41        |
| Mail carriers, post office                        | 42        |
| Mail handlers, except post office                 | 36        |
| Messengers and office runners                     | 19        |
| Meter readers, utilities                          | 36        |
| <i>Office machine operators</i>                   |           |
| Bookkeeping and billing machine operators         | 45        |
| Calculating machine operator                      | 45        |
| Computer and peripheral equipment operators       | 45        |
| Duplicating machine operators                     | 45        |
| Keypunch operators                                | 45        |
| Tabulating machine operators                      | 45        |
| Office machine operators, n.e.c.                  | 45        |
| Payroll and timekeeping clerks                    | 41        |
| Postal clerks                                     | 43        |
| Proofreaders                                      | 36        |
| Real estate appraisers                            | 43        |
| Receptionists                                     | 39        |
| Secretaries                                       |           |
| Secretaries, legal                                | 46        |
| Secretaries, medical                              | 46        |
| Secretaries, n.e.c.                               | 46        |
| Shipping and receiving clerks                     | 29        |
| Statistical clerks                                | 36        |
| Stenographers                                     | 43        |
| Stock clerks and storekeepers                     | 23        |

| Occupational Title                                               | SEI Score |
|------------------------------------------------------------------|-----------|
| Teacher aides, except school monitors                            | 36        |
| Telegraph messengers                                             | 30        |
| Telegraph operators                                              | 44        |
| Telephone operators                                              | 40        |
| Ticket, station, and express agents                              | 35        |
| Typists                                                          | 41        |
| Weighers                                                         | 36        |
| Miscellaneous clerical workers                                   | 36        |
| Not specified clerical workers                                   | 36        |
| Clerical and kindred workers—allocated                           | 36        |
| <i>CRAFTSMEN AND KINDRED WORKERS</i>                             |           |
| Automobile accessories installers                                | 47        |
| Bakers                                                           | 34        |
| Blacksmiths                                                      | 36        |
| Boilermakers                                                     | 31        |
| Bookbinders                                                      | 31        |
| Brickmasons and stonemasons                                      | 36        |
| Brickmasons and stonemasons, apprentice                          | 36        |
| Bulldozer operators                                              | 33        |
| Cabinetmakers                                                    | 39        |
| Carpenters                                                       | 40        |
| Carpenter apprentices                                            | 40        |
| Carpet installers                                                | 47        |
| Cement and concrete finishers                                    | 32        |
| Compositors and typesetters                                      | 38        |
| Printing trades apprentices, except pressmen                     | 40        |
| Cranemen, derrickmen, and hoistmen                               | 39        |
| Decorators and window dressers                                   | 37        |
| Dental laboratory technicians                                    | 47        |
| Electricians                                                     | 49        |
| Electrician apprentices                                          | 41        |
| Electric power line technicians and cable technicians            | 39        |
| Electrotypers and stereotypers                                   | 38        |
| Engravers, except photoengravers                                 | 41        |
| Excavating, grading and road machine operators, except bulldozer | 33        |
| Floor layers, except tile setters                                | 40        |

| Occupational Title                                         | SEI Score |
|------------------------------------------------------------|-----------|
| Foremen, n.e.c.                                            | 45        |
| Forgers and hammerers                                      | 36        |
| Furniture and wood finishers                               | 29        |
| Furriers                                                   | 35        |
| Glaziers                                                   | 26        |
| Heat treaters, annealers, and temperers                    | 36        |
| Inspectors, scalers, and graders: log and lumber           | 31        |
| Inspectors, n.e.c.                                         | 31        |
| Jewelers and watchmakers                                   | 37        |
| Job and die setters, metal                                 | 48        |
| Locomotive engineers                                       | 51        |
| Locomotive firemen                                         | 36        |
| Machinists                                                 | 48        |
| Machinist apprentices                                      | 41        |
| Mechanics and repair technicians                           |           |
| Air-conditioning, heating, and refrigeration               | 37        |
| Aircraft                                                   | 48        |
| Automobile body repair mechanics                           | 37        |
| Automobile mechanics                                       | 37        |
| Automobile mechanic apprentices                            | 37        |
| Data processing machine repairmen                          | 34        |
| Farm implements                                            | 33        |
| Heavy equipment mechanics, including diesel                | 33        |
| Household appliance and accessory installers and mechanics | 33        |
| Loom fixers                                                | 30        |
| Office machines                                            | 34        |
| Radio and television                                       | 35        |
| Railroad and car shop                                      | 37        |
| Mechanic, except auto, apprentices                         | 41        |
| Miscellaneous mechanics and repair technicians             | 35        |
| Millers; grain, flour, and feed                            | 25        |
| Millwrights                                                | 40        |
| Molders, metal                                             | 39        |
| Molder, apprentices                                        | 39        |
| Motion picture projectionists                              | 34        |
| Opticians, and lens grinders and polishers                 | 51        |

| Occupational Title                            | SEI Score |
|-----------------------------------------------|-----------|
| Painters, construction and maintenance        | 30        |
| Painter apprentices                           | 30        |
| Paperhangers                                  | 24        |
| Pattern and model makers, except paper        | 39        |
| Photoengravers and lithographers              | 40        |
| Piano and organ tuners and repair technicians | 32        |
| Plasterers                                    | 33        |
| Plasterer apprentices                         | 33        |
| Plumber and pipe fitters                      | 41        |
| Plumber and pipe fitter apprentices           | 41        |
| Power station operators                       | 39        |
| Pressmen and plate printers, printing         | 40        |
| Pressmen apprentices                          | 40        |
| Rollers and finishers, metal                  | 36        |
| Roofers and slaters                           | 31        |
| Sheetmetal workers and tinsmiths              | 37        |
| Sheetmetal apprentices                        | 37        |
| Shipfitters                                   | 36        |
| Shoe repairers                                | 33        |
| Sign painters and letterers                   | 30        |
| Stationary engineers                          | 35        |
| Stone cutters and stone carvers               | 33        |
| Structural metal craftsmen                    | 36        |
| Tailors                                       | 41        |
| Telephone installers and repair technicians   | 39        |
| Telephone line technicians and splicers       | 39        |
| Tile setters                                  | 36        |
| Tool and die makers                           | 42        |
| Tool and die maker apprentices                | 41        |
| Upholsterers                                  | 30        |
| Specified craft apprentices, n.e.c.           | 41        |
| Not specified apprentices                     | 41        |
| Craftsmen and kindred workers, n.e.c.         | 47        |
| Former members of the Armed Forces            | 47        |
| Craftsmen and kindred workers—allocate        | 47        |

| Occupational Title                                   | SEI Score |
|------------------------------------------------------|-----------|
| Current members of the Armed Forces                  | 47        |
| <i>OPERATIVES, EXCEPT TRANSPORT</i>                  |           |
| Asbestos and insulation workers                      | 28        |
| Assemblers                                           | 27        |
| Blasters and powdermen                               | 32        |
| Bottling and canning operatives                      | 23        |
| Chainmen, rod men, and axmen; surveying              | 39        |
| Checkers, examiners, and inspectors; manufacturing   | 36        |
| Clothing ironers and pressers                        | 18        |
| Cutting operatives, n.e.c.                           | 26        |
| Dressmakers and textile workers, except factory      | 32        |
| Drillers, earth                                      | 27        |
| Dry wall installers and lathers                      | 27        |
| Dyers                                                | 25        |
| Filers, polishers, sanders, and buffers              | 19        |
| Furnacemen, smeltermen, and pourers                  | 33        |
| Garage workers and gas station attendants            | 22        |
| Graders and sorters, manufacturing                   | 33        |
| Produce graders and packers, except factory and farm | 19        |
| Heaters, metal                                       | 33        |
| Laundry and dry cleaning operatives, n.e.c.          | 18        |
| Meat cutters and butchers, except manufacturing      | 32        |
| Meat cutters and butchers, manufacturing             | 28        |
| Meat wrappers, retail trade                          | 19        |
| Metal platers                                        | 29        |
| Milliners                                            | 33        |
| Mine operatives, n.e.c.                              | 26        |
| Mixing operatives                                    | 29        |
| Oilers and greasers, except auto                     | 24        |
| Packers and wrappers, n.e.c.                         | 19        |
| Painters, manufactured articles                      | 29        |
| Photographic process workers                         | 36        |
| Precision machine operatives                         |           |
| Drill press operatives                               | 29        |

| Occupational Title                          | SEI Score |
|---------------------------------------------|-----------|
| Grinding machine operatives                 | 29        |
| Lathe and milling machine operatives        | 29        |
| Precision machine operatives, n.e.c.        | 29        |
| Punch and stamping press operatives         | 29        |
| Riveters and fasteners                      | 29        |
| Sailors and deckhands                       | 34        |
| Sawyers                                     | 28        |
| Sewers and stitchers                        | 25        |
| Shoemaking machine operatives               | 32        |
| Solderers                                   | 29        |
| Stationary firemen                          | 33        |
| <i>Textile operatives</i>                   |           |
| Carding, lapping, and combing operatives    | 29        |
| Knitters, loopers, and toppers              | 29        |
| Spinners, twisters, and winders             | 25        |
| Weavers                                     | 25        |
| Textile operatives, n.e.c.                  | 29        |
| Welders and flame-cutters                   | 40        |
| Winding operatives, n.e.c.                  | 29        |
| Machine operatives, miscellaneous specified | 32        |
| Machine operatives, not specified           | 32        |
| Miscellaneous operatives                    | 32        |
| Not specified operatives                    | 32        |
| Operatives, except transport—allocated      | 32        |
| <i>TRANSPORT EQUIPMENT OPERATIVES</i>       |           |
| Boat and canal operators                    | 37        |
| Bus drivers                                 | 32        |
| Conductors and drivers, urban rail transit  | 28        |
| Deliverypersons                             | 28        |
| Forklift and tow motor operatives           | 29        |
| Motormen; mine, factory, logging camp, etc. | 27        |
| Parking attendants                          | 22        |
| Railroad brakemen                           | 35        |
| Railroad switchmen                          | 33        |
| Taxicab drivers and chauffeurs              | 22        |
| Truck drivers                               | 32        |

| Occupational Title                                             | SEI Score |
|----------------------------------------------------------------|-----------|
| Transport equipment operatives—allocated                       | 29        |
| <i>LABORERS, EXCEPT FARM</i>                                   |           |
| Animal caretakers, except farm                                 | 29        |
| Carpenters' helpers                                            | 23        |
| Construction laborers, except carpenters' helpers              | 17        |
| Fishermen and oystermen                                        | 30        |
| Freight and material handlers                                  | 17        |
| Garbage collectors                                             | 17        |
| Gardeners and groundkeepers, except farm                       | 23        |
| Longshoremen and stevedores                                    | 24        |
| Lumbermen, raftsmen, and woodchoppers                          | 26        |
| Stockhandlers                                                  | 17        |
| Teamsters                                                      | 12        |
| Vehicle washers and equipment cleaners                         | 17        |
| Warehousemen, n.e.c.                                           | 20        |
| Miscellaneous laborers                                         | 17        |
| Not specified laborers                                         | 17        |
| Laborers, except farm—allocated                                | 17        |
| <i>FARMERS AND FARM MANAGERS</i>                               |           |
| Farmers (owners and tenants)                                   | 41        |
| Farm managers                                                  | 44        |
| Farmers and farm managers—allocated                            | 41        |
| <i>FARMERS, LABORERS AND FARM FOREMEN</i>                      |           |
| Farm forepersons                                               | 35        |
| Farm laborers, wage workers                                    | 18        |
| Farm laborers, unpaid family workers                           | 18        |
| Farm laborers, unpaid family workers                           | 18        |
| Farm service laborers, self-employed                           | 27        |
| Farm laborers, farm forepersons, and kindred workers—allocated | 19        |
| <i>SERVICE WORKERS, EXCEPT PRIVATE HOUSEHOLD</i>               |           |
| Cleaning service workers                                       |           |
| Chambermaids and maids, except private household               | 14        |
| Cleaners                                                       | 12        |

| Occupational Title                                     | SEI Score |
|--------------------------------------------------------|-----------|
| Janitors and sextons                                   | 16        |
| Food service workers                                   |           |
| Bartenders                                             | 20        |
| Busboys                                                | 22        |
| Cooks, except private household                        | 26        |
| Dishwashers                                            | 22        |
| Food counters and fountain workers                     | 15        |
| Waiters                                                | 20        |
| Food service workers, n.e.c., except private household | 22        |
| <i>Health service workers</i>                          |           |
| Dental assistants                                      | 48        |
| Health aides, except nursing                           | 48        |
| Health trainees                                        | 36        |
| Midwives                                               | 23        |
| Nursing aides, orderlies, and attendants               | 36        |
| Practical nurses                                       | 42        |
| <i>Personal service workers</i>                        |           |
| Airline flight attendants                              | 36        |
| Attendants, recreation and amusement                   | 15        |
| Attendants, personal service, n.e.c.                   | 14        |
| Baggage porters and bellhops                           | 14        |
| Barbers                                                | 38        |
| Boarding and lodging housekeepers                      | 22        |
| Bootblacks                                             | 9         |
| Child care workers, except private households          | 25        |
| Elevator operators                                     | 21        |
| Hairdressers and cosmetologists                        | 33        |
| Personal service apprentices                           | 14        |
| Housekeepers, except private households                | 36        |
| School monitors                                        | 22        |
| Ushers, recreation and amusement                       | 15        |
| Welfare service aides                                  | 14        |
| <i>Protective service workers</i>                      |           |
| Crossing guards and bridge tenders                     | 24        |
| Firefighters, fire protection                          | 44        |

Note: n.e.c. = not elsewhere classified.
